# Supplementary material for: Dynamic Mathematical Modeling of IL13-Induced Signaling in Hodgkin and Primary Mediastinal B-Cell Lymphoma Allows Prediction of Therapeutic Targets
Source: Oxford University Press journal article supplement (doi:10.1158/0008-5472.can-10-2987), 2010-12-02
Supplement: 00085472can102987-sup-supplementary_file_ii_medb-1_data.xls [file 00085472can102987-sup-supplementary_file_ii_medb-1_data.xls]

## Sheet: DataSuMMARY
# MCode	drivingFunctions(1).name = 'IL13stimulation';
# MCode	drivingFunctions(1).stimuli(1) = pwGetDrivingFunction('steps',[-300 0],[0 0]);
# MCode	drivingFunctions(1).stimuli(2) = pwGetDrivingFunction('steps',[-300 0],[0 4]);
# MCode	drivingFunctions(1).stimuli(3) = pwGetDrivingFunction('steps',[-300 0],[0 20]);
# MCode	drivingFunctions(1).stimuli(4) = pwGetDrivingFunction('steps',[-300 0],[0 80]);
xCol-Time-min	parCol-Stimulus	pIL4Ra_obs	stdCol-pIL4Ra_obs	pJAK2_obs	stdCol-pJAK2_obs	IL13-cell_obs	stdCol-IL13-cell_obs	RecSurf_obs	stdCol-RecSurf_obs	SOCS3mRNA_obs	stdCol-SOCS3mRNA_obs	pSTAT5_obs	stdCol-pSTAT5_obs	SOCS3_obs	stdCol-SOCS3_obs	CD274mRNA_obs	stdCol-CD274mRNA_obs
0	1	NaN	NaN	NaN	NaN	0.61574	0.650697	1.28975	0.059	1.56236	8.17226	NaN	NaN	8.33408	23.7509	0	0.43
5	1	NaN	NaN	NaN	NaN	NaN	NaN	NaN	NaN	NaN	NaN	NaN	NaN	NaN	NaN	NaN	NaN
10	1	NaN	NaN	NaN	NaN	NaN	NaN	1.57854	0.059	NaN	NaN	NaN	NaN	NaN	NaN	NaN	NaN
15	1	NaN	NaN	NaN	NaN	0.295869	0.634703	NaN	NaN	NaN	NaN	NaN	NaN	NaN	NaN	NaN	NaN
20	1	NaN	NaN	NaN	NaN	NaN	NaN	1.51509	0.059	0.992868	7.80591	NaN	NaN	6.44266	23.5725	NaN	NaN
30	1	NaN	NaN	NaN	NaN	0.322285	0.636024	1.50496	0.059	14.8345	16.7102	NaN	NaN	NaN	NaN	-0.105611	0.419439
40	1	NaN	NaN	NaN	NaN	NaN	NaN	NaN	NaN	11.6752	14.6778	NaN	NaN	7.62479	23.684	NaN	NaN
50	1	NaN	NaN	NaN	NaN	NaN	NaN	NaN	NaN	NaN	NaN	NaN	NaN	NaN	NaN	NaN	NaN
60	1	NaN	NaN	NaN	NaN	0.169528	0.628386	1.6178	0.059	11.6268	14.6467	NaN	NaN	8.68872	23.7843	0.0421145	0.434211
80	1	NaN	NaN	NaN	NaN	NaN	NaN	NaN	NaN	5.71028	10.8406	NaN	NaN	NaN	NaN	NaN	NaN
90	1	NaN	NaN	NaN	NaN	0.257966	0.632808	1.57237	0.059	1.24343	7.9671	NaN	NaN	13.2991	24.2191	-0.0381367	0.426186
100	1	NaN	NaN	NaN	NaN	NaN	NaN	NaN	NaN	0.659245	7.59129	NaN	NaN	NaN	NaN	NaN	NaN
120	1	NaN	NaN	NaN	NaN	0.23155	0.631487	1.43062	0.059	14.5473	16.5255	NaN	NaN	16.4317	24.5145	0.00983362	0.430983
0	2	0.338108	0.234392	0.187105	0.111443	NaN	NaN	1.40469	0.059	NaN	NaN	1.59841	4.71673	NaN	NaN	NaN	NaN
2.5	2	NaN	NaN	0.53356	0.216696	NaN	NaN	NaN	NaN	NaN	NaN	NaN	NaN	NaN	NaN	NaN	NaN
4	2	1.08434	0.316477	0.645132	0.250591	NaN	NaN	NaN	NaN	NaN	NaN	NaN	NaN	NaN	NaN	NaN	NaN
5	2	0.539112	0.256502	0.639432	0.24886	1.186	0.67921	NaN	NaN	NaN	NaN	2.01215	4.78756	NaN	NaN	NaN	NaN
7	2	0.299787	0.230177	0.245165	0.129081	NaN	NaN	NaN	NaN	NaN	NaN	NaN	NaN	NaN	NaN	NaN	NaN
7.5	2	NaN	NaN	0.152528	0.100938	NaN	NaN	NaN	NaN	NaN	NaN	NaN	NaN	NaN	NaN	NaN	NaN
10	2	0.845157	0.290167	0.834683	0.308177	1.4582	0.69282	1.36298	0.059	NaN	NaN	7.64469	5.75186	NaN	NaN	NaN	NaN
12.5	2	NaN	NaN	1.45842	0.497667	NaN	NaN	NaN	NaN	NaN	NaN	NaN	NaN	NaN	NaN	NaN	NaN
15	2	1.17599	0.326559	1.28888	0.446162	1.79703	0.709761	NaN	NaN	NaN	NaN	30.34	9.63729	NaN	NaN	NaN	NaN
17.5	2	1.35789	0.346568	1.27539	0.442063	NaN	NaN	NaN	NaN	NaN	NaN	NaN	NaN	NaN	NaN	NaN	NaN
20	2	1.44225	0.355848	1.4329	0.489914	1.78324	0.709072	1.33359	0.059	NaN	NaN	34.4964	10.3489	NaN	NaN	NaN	NaN
22.5	2	1.12307	0.320737	NaN	NaN	NaN	NaN	NaN	NaN	NaN	NaN	NaN	NaN	NaN	NaN	NaN	NaN
25	2	1.55187	0.367906	0.842801	0.310643	NaN	NaN	NaN	NaN	NaN	NaN	54.7396	13.8145	NaN	NaN	NaN	NaN
30	2	1.14789	0.323467	1.36716	0.469945	2.2955	0.734685	1.21054	0.059	NaN	NaN	48.8679	12.8093	NaN	NaN	NaN	NaN
35	2	0.995445	0.306699	1.75316	0.587211	NaN	NaN	NaN	NaN	NaN	NaN	57.7683	14.333	NaN	NaN	NaN	NaN
40	2	1.24232	0.333855	1.43444	0.490383	2.47008	0.743414	NaN	NaN	NaN	NaN	68.4	16.1532	NaN	NaN	NaN	NaN
45	2	1.28102	0.338113	1.03695	0.369626	NaN	NaN	NaN	NaN	NaN	NaN	57.532	14.2926	NaN	NaN	NaN	NaN
50	2	1.19453	0.328599	1.15032	0.404066	2.51487	0.745654	NaN	NaN	NaN	NaN	84.0864	18.8387	NaN	NaN	NaN	NaN
60	2	1.13333	0.321866	1.37391	0.471994	2.65614	0.752717	1.25691	0.059	NaN	NaN	80.4744	18.2203	NaN	NaN	NaN	NaN
70	2	NaN	NaN	NaN	NaN	NaN	NaN	NaN	NaN	NaN	NaN	66.616	15.8478	NaN	NaN	NaN	NaN
75	2	NaN	NaN	1.21668	0.424227	NaN	NaN	NaN	NaN	NaN	NaN	NaN	NaN	NaN	NaN	NaN	NaN
80	2	NaN	NaN	NaN	NaN	2.95592	0.767706	NaN	NaN	NaN	NaN	57.6582	14.3142	NaN	NaN	NaN	NaN
90	2	NaN	NaN	1.49004	0.507273	NaN	NaN	1.2556	0.059	NaN	NaN	NaN	NaN	NaN	NaN	NaN	NaN
100	2	NaN	NaN	NaN	NaN	3.19941	0.77988	NaN	NaN	NaN	NaN	52.7986	13.4822	NaN	NaN	NaN	NaN
105	2	NaN	NaN	0.365589	0.165666	NaN	NaN	NaN	NaN	NaN	NaN	NaN	NaN	NaN	NaN	NaN	NaN
120	2	NaN	NaN	0.667532	0.257396	2.62054	0.750937	1.23065	0.059	NaN	NaN	56.1767	14.0605	NaN	NaN	NaN	NaN
0	3	0.185419	0.217596	0.221391	0.121859	NaN	NaN	NaN	NaN	1.39986	8.06773	1.71673	4.73699	35.102	26.2751	0	0.43
4	3	0.44224	0.245846	0.689573	0.264092	NaN	NaN	NaN	NaN	NaN	NaN	NaN	NaN	NaN	NaN	NaN	NaN
5	3	1.63083	0.376591	1.27825	0.442933	3.97468	0.818644	NaN	NaN	NaN	NaN	9.77203	6.11606	NaN	NaN	NaN	NaN
7	3	1.92629	0.409092	1.68875	0.567642	NaN	NaN	NaN	NaN	NaN	NaN	NaN	NaN	NaN	NaN	NaN	NaN
10	3	1.40014	0.351215	1.38882	0.476523	4.12974	0.826397	NaN	NaN	NaN	NaN	32.8116	10.0604	NaN	NaN	NaN	NaN
15	3	2.22395	0.441835	2.02085	0.668535	5.01642	0.870731	NaN	NaN	NaN	NaN	50.8032	13.1406	NaN	NaN	NaN	NaN
20	3	2.25874	0.445661	2.10261	0.693373	4.93257	0.866539	NaN	NaN	15.5938	17.1987	68.9926	16.2546	23.8816	25.217	NaN	NaN
25	3	NaN	NaN	1.64294	0.553725	NaN	NaN	NaN	NaN	NaN	NaN	107.907	22.9167	NaN	NaN	NaN	NaN
30	3	1.54174	0.366792	2.05563	0.6791	6.02485	0.921152	NaN	NaN	29.6611	26.2482	111.571	23.5441	NaN	NaN	-0.190858	0.410914
35	3	NaN	NaN	NaN	NaN	NaN	NaN	NaN	NaN	NaN	NaN	106.742	22.7174	NaN	NaN	NaN	NaN
40	3	1.65995	0.379795	1.76443	0.590633	6.35218	0.937519	NaN	NaN	250.751	168.476	104.28	22.2959	79.7199	30.4826	NaN	NaN
45	3	2.28349	0.448384	1.81682	0.606551	NaN	NaN	NaN	NaN	NaN	NaN	125.274	25.89	NaN	NaN	NaN	NaN
50	3	NaN	NaN	1.09966	0.388676	5.87898	0.913859	NaN	NaN	NaN	NaN	115.703	24.2514	NaN	NaN	NaN	NaN
60	3	1.36499	0.347349	1.48067	0.504429	5.07614	0.873717	NaN	NaN	208.022	140.988	128.237	26.3973	148.678	36.9853	0.674775	0.497478
70	3	NaN	NaN	NaN	NaN	NaN	NaN	NaN	NaN	NaN	NaN	123.237	25.5413	NaN	NaN	NaN	NaN
80	3	NaN	NaN	1.58403	0.535828	6.21091	0.930456	NaN	NaN	719.619	470.098	89.6541	19.7919	259.113	47.3993	NaN	NaN
90	3	NaN	NaN	NaN	NaN	NaN	NaN	NaN	NaN	1154.94	750.142	65.8306	15.7133	271.908	48.6059	2.30498	0.660498
100	3	NaN	NaN	0.922926	0.334985	5.94674	0.917247	NaN	NaN	504.631	331.797	108.298	22.9837	255.376	47.0469	NaN	NaN
120	3	NaN	NaN	1.20439	0.420492	5.09452	0.874636	NaN	NaN	1017.02	661.416	80.7501	18.2675	204.461	42.2457	1.77499	0.607499
0	4	NaN	NaN	NaN	NaN	NaN	NaN	1.32131	0.059	NaN	NaN	NaN	NaN	6.04829	23.5354	NaN	NaN
5	4	NaN	NaN	NaN	NaN	9.78176	1.109	NaN	NaN	NaN	NaN	NaN	NaN	NaN	NaN	NaN	NaN
10	4	NaN	NaN	NaN	NaN	9.95175	1.1175	1.17907	0.059	NaN	NaN	NaN	NaN	NaN	NaN	NaN	NaN
15	4	NaN	NaN	NaN	NaN	10.6742	1.15362	NaN	NaN	NaN	NaN	NaN	NaN	NaN	NaN	NaN	NaN
20	4	NaN	NaN	NaN	NaN	11.2485	1.18233	1.04216	0.059	NaN	NaN	NaN	NaN	6.23154	23.5526	NaN	NaN
30	4	NaN	NaN	NaN	NaN	12.7473	1.25728	1.05653	0.059	NaN	NaN	NaN	NaN	NaN	NaN	NaN	NaN
40	4	NaN	NaN	NaN	NaN	12.3982	1.23982	NaN	NaN	NaN	NaN	NaN	NaN	87.4506	31.2116	NaN	NaN
50	4	NaN	NaN	NaN	NaN	10.9694	1.16838	NaN	NaN	NaN	NaN	NaN	NaN	NaN	NaN	NaN	NaN
60	4	NaN	NaN	NaN	NaN	8.28635	1.03423	1.05609	0.059	NaN	NaN	NaN	NaN	103.271	32.7035	NaN	NaN
80	4	NaN	NaN	NaN	NaN	11.3449	1.18716	NaN	NaN	NaN	NaN	NaN	NaN	221.741	43.8752	NaN	NaN
90	4	NaN	NaN	NaN	NaN	NaN	NaN	1.07874	0.059	NaN	NaN	NaN	NaN	NaN	NaN	NaN	NaN
100	4	NaN	NaN	NaN	NaN	11.1979	1.17981	NaN	NaN	NaN	NaN	NaN	NaN	262.85	47.7518	NaN	NaN
120	4	NaN	NaN	NaN	NaN	10.5524	1.14753	0.929233	0.059	NaN	NaN	NaN	NaN	140.768	36.2394	NaN	NaN
